# Supplementary material for: Global patterns of crop yield stability under additional nutrient and water inputs
Source: PubMed Central journal article supplement (PMC6021068; doi:10.1371/journal.pone.0198748), 2018-06-27
Supplement: pone.0198748.s001.pdf [file pone.0198748.s001.pdf]

# Supplementary material

## Global patterns of crop yield stability under additional nutrient and water inputs

---

Christoph Müller<sup>1,\*</sup>, Joshua Elliott<sup>2,3</sup>, Thomas A. M. Pugh<sup>4,5</sup>, Alex C. Ruane<sup>3,6</sup>, Philippe Ciais<sup>7</sup>, Juraj Balkovic<sup>8,9</sup>, Delphine Deryng<sup>3,10</sup>, Christian Folberth<sup>8</sup>, R. Cesar Izaurralde<sup>11,12</sup>, Curtis D. Jones<sup>11</sup>, Nikolay Khabarov<sup>8</sup>, Peter Lawrence<sup>13</sup>, Wenfeng Liu<sup>7,14</sup>, Ashwan D. Reddy<sup>11</sup>, Erwin Schmid<sup>15</sup>, Xuhui Wang<sup>7,16</sup>

<sup>1</sup> *Potsdam Institute for Climate Impact Research, Potsdam, Germany*

<sup>2</sup> *University of Chicago and ANL Computation Institute, Chicago, USA*

<sup>3</sup> *Columbia University Center for Climate Systems Research, New York, USA*

<sup>4</sup> *School of Geography, Earth & Environmental Science and Birmingham Institute of Forest Research, University of Birmingham, Birmingham, United Kingdom*

<sup>5</sup> *IMK-IFU, Karlsruhe Institute of Technology, Garmisch-Partenkirchen, Germany.*

<sup>6</sup> *National Aeronautics and Space Administration Goddard Institute for Space Studies, New York, USA*

<sup>7</sup> *Laboratoire des Sciences du Climat et de l'Environnement. Gif-sur-Yvette, France*

<sup>8</sup> *Ecosystem Services and Management Program, International Institute for Applied Systems Analysis, Laxenburg, Austria*

<sup>9</sup> *Department of Soil Science, Faculty of Natural Sciences, Comenius University in Bratislava, Bratislava, Slovak Republic*

<sup>10</sup> *Climate Analytics, Berlin, Germany*

<sup>11</sup> *University of Maryland, Department of Geographical Sciences, College Park, USA*

<sup>12</sup> *Texas A&M University, Texas AgriLife Research and Extension, Temple, USA*

<sup>13</sup> *National Center for Atmospheric Research, Earth System Laboratory, Boulder, USA*

<sup>14</sup> *Eawag, Swiss Federal Institute of Aquatic Science and Technology, Dübendorf, Switzerland*

<sup>15</sup> *Institute for Sustainable Economic Development, University of Natural Resources and Life Sciences, Vienna, Austria*

<sup>16</sup> *Sino-French Institute of Earth System Sciences, Peking University, Beijing, China*

\* Corresponding author

Christoph.Mueller@pik-potsdam.de

**Table A: Global time series correlation coefficients of the actual simulations and the reported national time series (FAO statistics [1]). Data taken from Müller, Elliott [2]. Some models did not supply data for all crops, which is indicated with NA. Some correlation coefficients are not statistically significant, which is indicated with '(ns)'.**

| GGCM          | Maize      | Wheat      | Rice       | Soybean    |
|---------------|------------|------------|------------|------------|
| pDSSAT        | 0.843      | 0.531      | 0.288 (ns) | 0.544      |
| EPIC-Boku     | 0.663      | 0.385      | 0.351      | 0.603      |
| EPIC-IIASA    | 0.700      | 0.597      | 0.187 (ns) | 0.278 (ns) |
| GEPIC         | 0.749      | 0.371      | 0.119      | 0.565      |
| pAPSIM        | 0.774      | 0.346      | NA         | 0.615      |
| PEGASUS       | 0.224 (ns) | 0.299 (ns) | NA         | 0.254 (ns) |
| CLM-Crop      | 0.295 (ns) | 0.299 (ns) | 0.161 (ns) | 0.326 (ns) |
| EPIC-TAMU     | 0.667      | 0.545      | NA         | NA         |
| ORCHIDEE-crop | 0.548      | 0.395      | 0.256 (ns) | 0.266 (ns) |
| PEPIC         | 0.687      | 0.397      | 0.373      | 0.389      |

**Table B: Standard deviation of global maize, wheat, rice, and soybean productivity (t DM/ha) over 30 years (1980-2009) of 9 individual GGCMs, their ensemble median and FAO statistics [1]. Data are shown for actual, unlimited (uWN), unlimited nutrients (uN) and unlimited water (uW) conditions. FAO data is only available for actual conditions. Lowest standard deviations per model are colored green, highest are colored orange.**

| Crop  | GGCM          | actual | uWN   | uN    | uW    |
|-------|---------------|--------|-------|-------|-------|
| maize | pDSSAT        | 0.272  | 0.345 | 0.440 | 0.186 |
|       | EPIC-Boku     | 0.207  | 0.170 | 0.221 | 0.140 |
|       | EPIC-IIASA    | 0.144  | 0.182 | 0.191 | 0.100 |
|       | GEPIC         | 0.227  | 0.224 | 0.273 | 0.144 |
|       | pAPSIM        | 0.195  | 0.214 | 0.286 | 0.096 |
|       | PEGASUS       | 0.106  | 0.174 | 0.267 | 0.128 |
|       | CLM-Crop      | 0.162  | 0.200 | 0.169 | 0.206 |
|       | EPIC-TAMU     | 0.191  | 0.232 | 0.238 | 0.135 |
|       | ORCHIDEE-crop |        |       |       |       |
|       | PEPIC         | 0.200  | 0.124 | 0.226 | 0.076 |
|       | median        | 0.195  | 0.200 | 0.238 | 0.135 |
|       | FAO           | 0.165  |       |       |       |
| wheat | pDSSAT        | 0.500  | 0.745 | 0.628 | 0.580 |
|       | EPIC-Boku     | 0.108  | 0.101 | 0.116 | 0.094 |
|       | EPIC-IIASA    | 0.230  | 0.374 | 0.316 | 0.238 |
|       | GEPIC         | 0.219  | 0.373 | 0.313 | 0.232 |
|       | pAPSIM        | 0.303  | 0.633 | 0.488 | 0.320 |
|       | PEGASUS       | 0.109  | 0.266 | 0.252 | 0.172 |
|       | CLM-Crop      | 0.100  | 0.054 | 0.101 | 0.047 |
|       | EPIC-TAMU     | 0.180  | 0.319 | 0.289 | 0.179 |
|       | ORCHIDEE-crop | 0.262  | 0.324 | 0.285 | 0.285 |
|       | PEPIC         | 0.074  | 0.074 | 0.117 | 0.040 |
|       | median        | 0.180  | 0.319 | 0.289 | 0.179 |
|       | FAO           | 0.059  |       |       |       |
| rice  | pDSSAT        | 0.169  | 0.207 | 0.226 | 0.156 |
|       | EPIC-Boku     | 0.029  | 0.028 | 0.036 | 0.022 |
|       | EPIC-IIASA    | 0.073  | 0.090 | 0.100 | 0.067 |
|       | GEPIC         | 0.072  | 0.124 | 0.119 | 0.074 |
|       | pAPSIM        |        |       |       |       |
|       | PEGASUS       |        |       |       |       |
|       | CLM-Crop      | 0.079  | 0.080 | 0.087 | 0.071 |
|       | EPIC-TAMU     |        |       |       |       |
|       | ORCHIDEE-crop | 0.102  | 0.101 | 0.107 | 0.096 |
|       | PEPIC         | 0.030  | 0.066 | 0.054 | 0.039 |

|         |               |       |       |       |       |
|---------|---------------|-------|-------|-------|-------|
|         | median        | 0.072 | 0.085 | 0.093 | 0.069 |
|         | FAO           | 0.041 |       |       |       |
| soybean | pDSSAT        | 0.230 | 0.222 | 0.237 | 0.222 |
|         | EPIC-Boku     | 0.140 | 0.079 | 0.140 | 0.079 |
|         | EPIC-IIASA    | 0.110 | 0.172 | 0.163 | 0.101 |
|         | GEPIC         | 0.151 | 0.164 | 0.170 | 0.118 |
|         | pAPSIM        | 0.197 | 0.215 | 0.198 | 0.215 |
|         | PEGASUS       | 0.077 | 0.080 | 0.077 | 0.080 |
|         | CLM-Crop      | 0.233 | 0.233 | 0.233 | 0.239 |
|         | EPIC-TAMU     |       |       |       |       |
|         | ORCHIDEE-crop |       |       |       |       |
|         | PEPIC         | 0.091 | 0.063 | 0.091 | 0.061 |
|         | median        | 0.146 | 0.168 | 0.167 | 0.109 |
|         | FAO           | 0.063 |       |       |       |

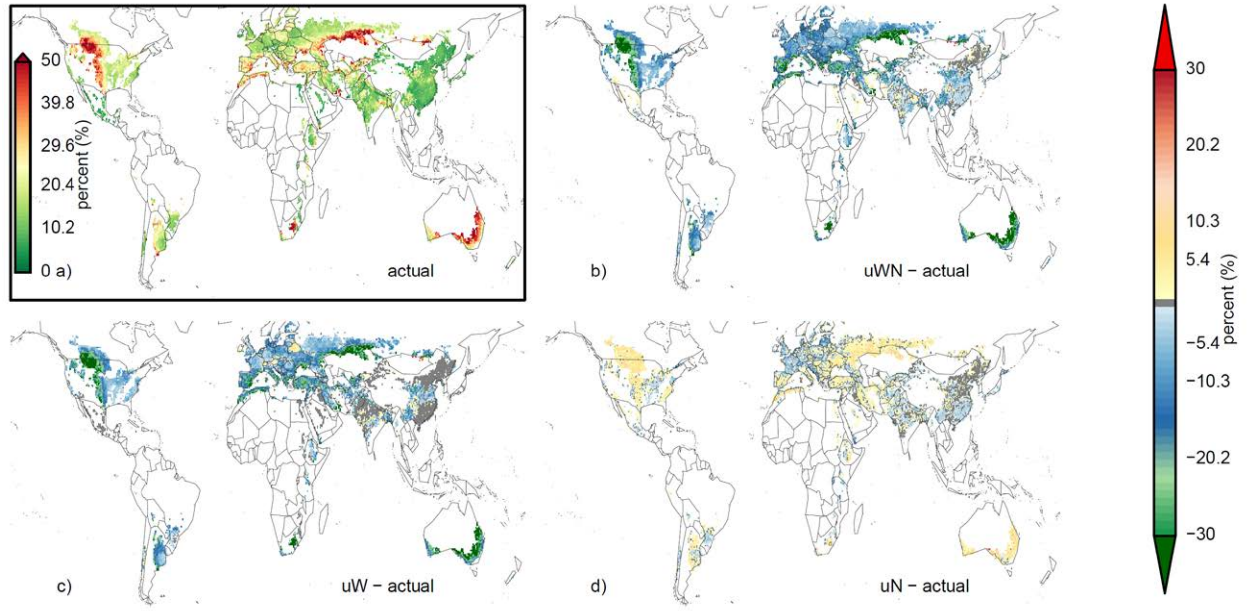

Figure A: same as Fig 1 of the main text, but for wheat

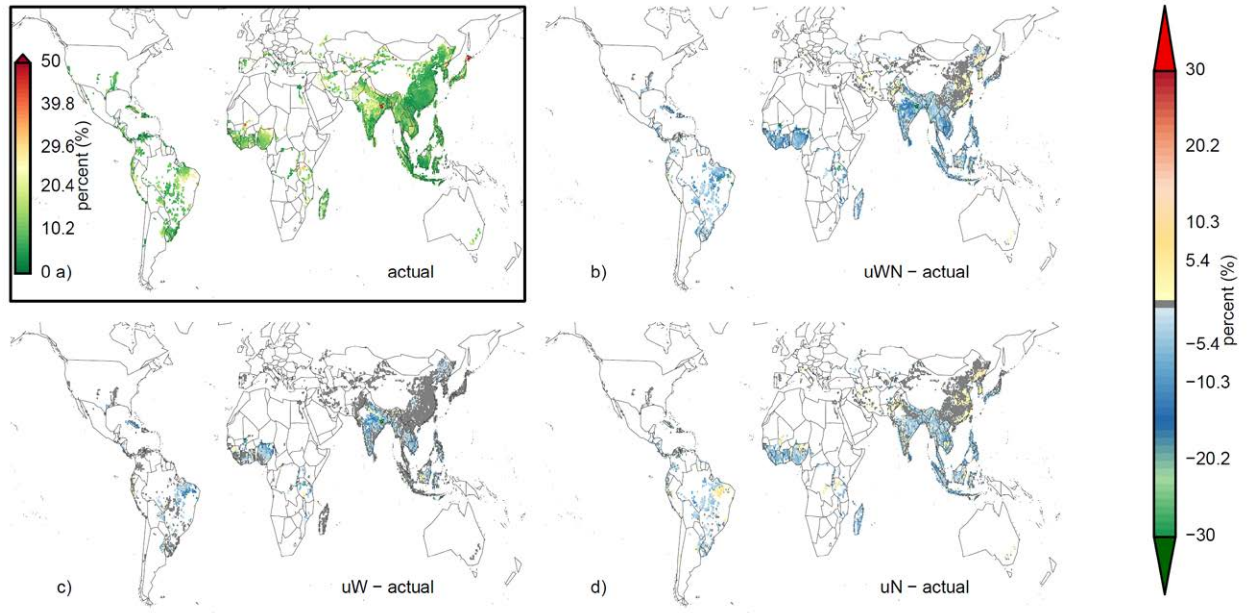

Figure B: same as Fig 1 of the main text, but for rice

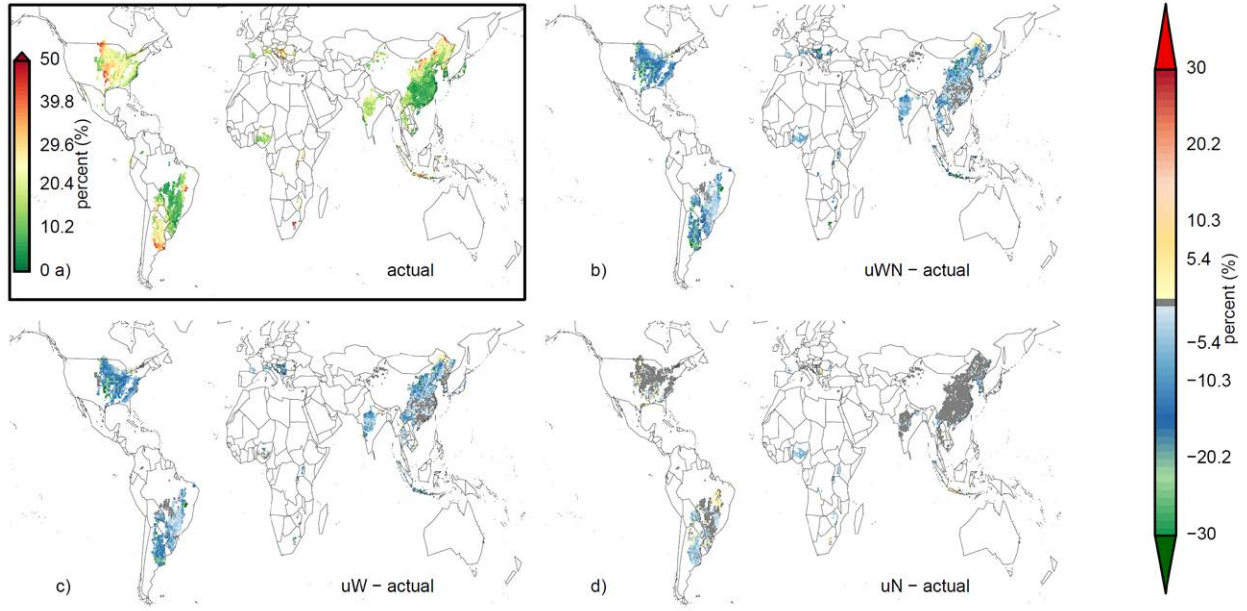

Figure C: same as Fig 1 of the main text, but for soybean

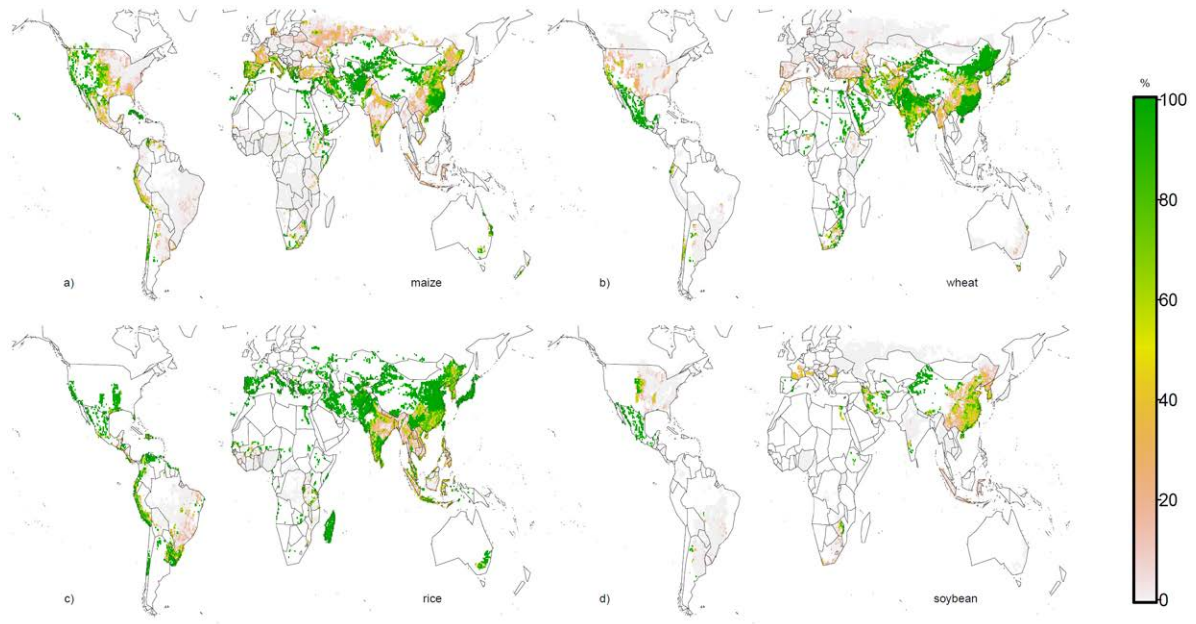

Figure D: shares of irrigated crop land in total cropland per crop (maize, wheat, rice, soybean) in percent as specified by the MIRCA2000 data set [3].

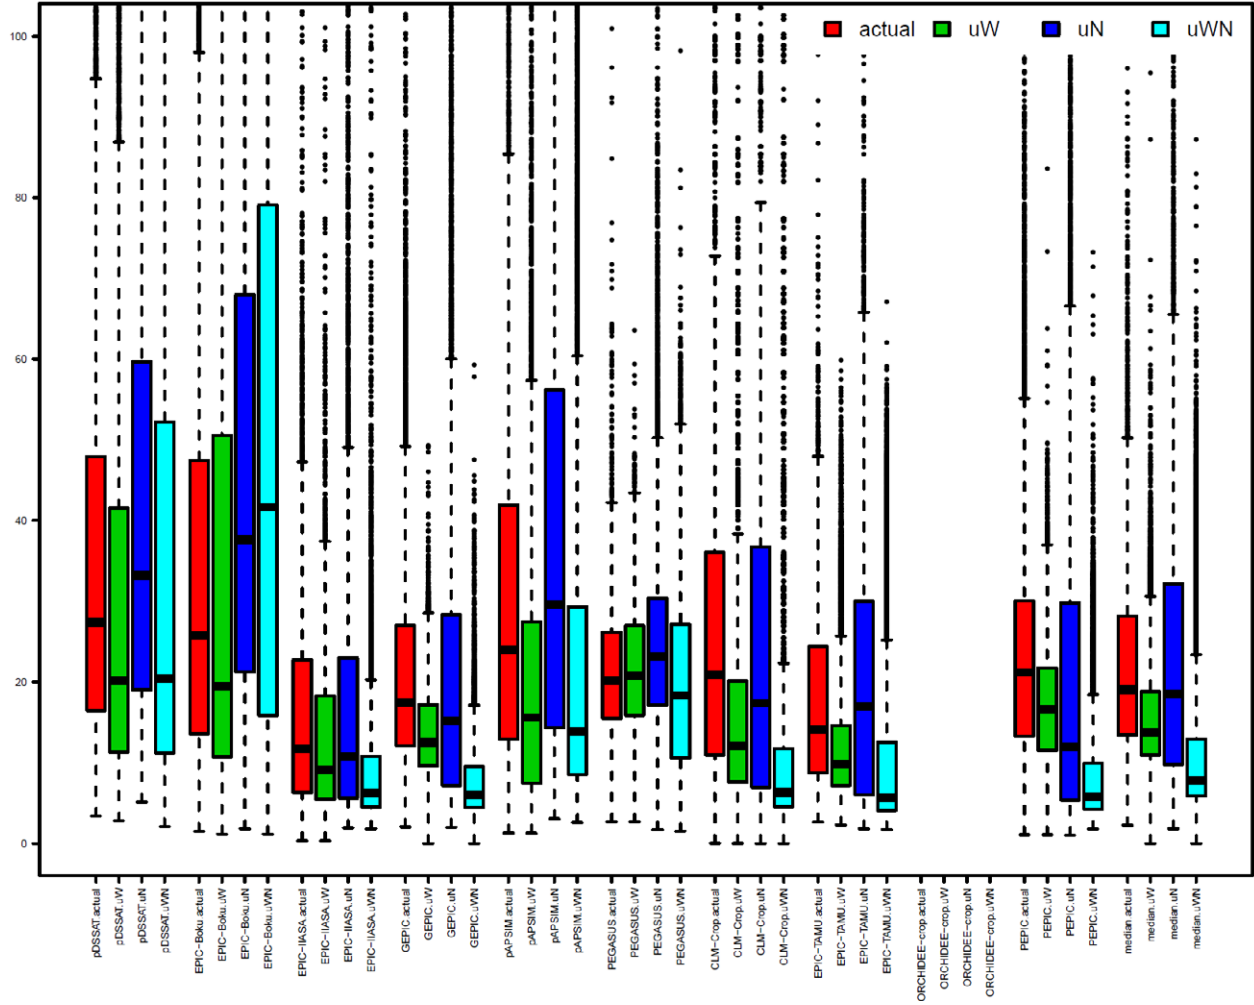

Figure E: as Fig 3 of the main text but for low input systems (<60 kgN ha<sup>-1</sup> year<sup>-1</sup>) only.



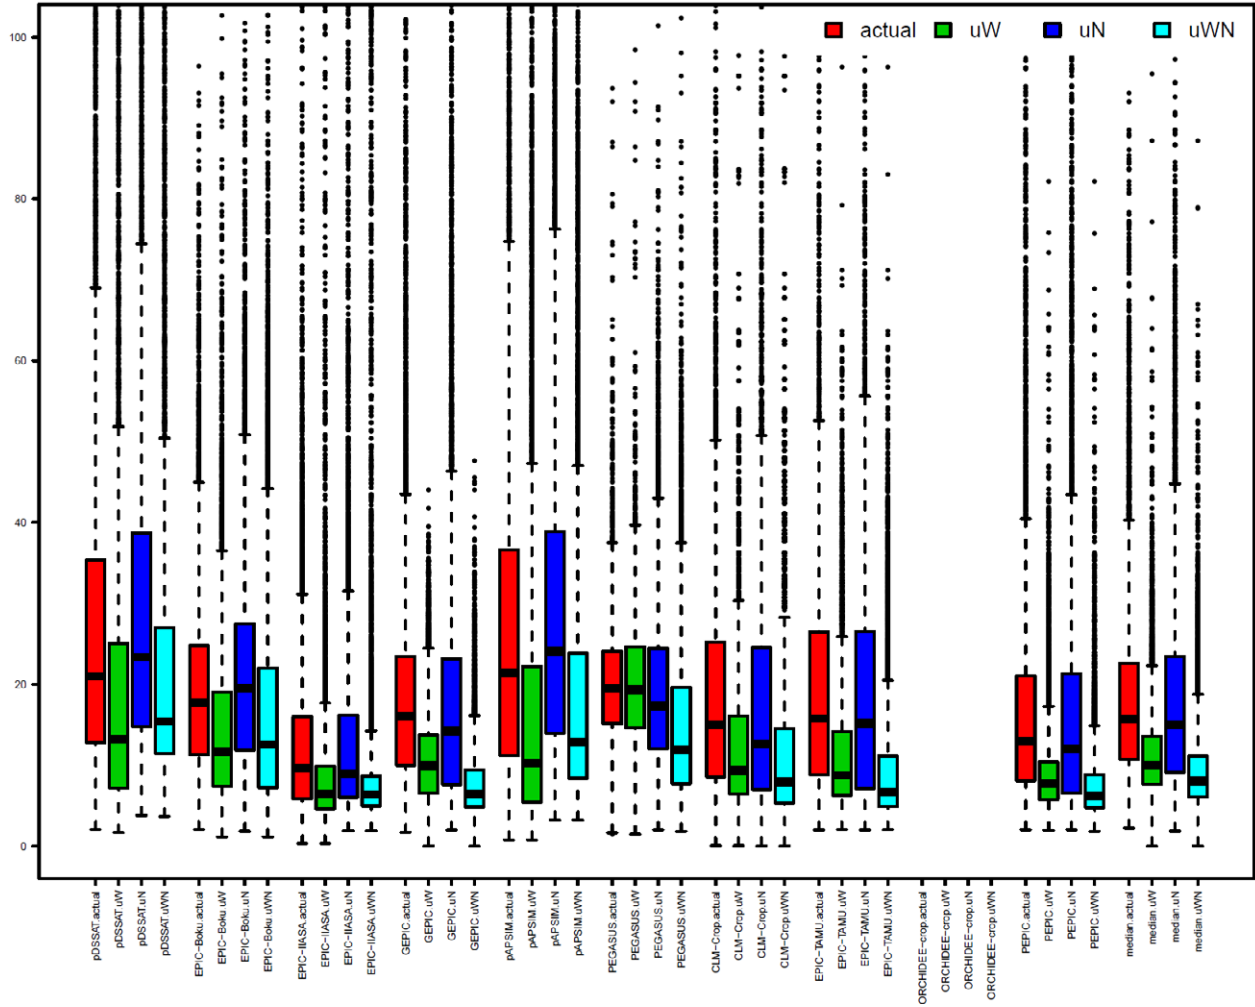

Figure F: same as Fig 3 of the main text but for high input systems ( $\geq 60 \text{ kgN ha}^{-1} \text{ year}^{-1}$ ) only.

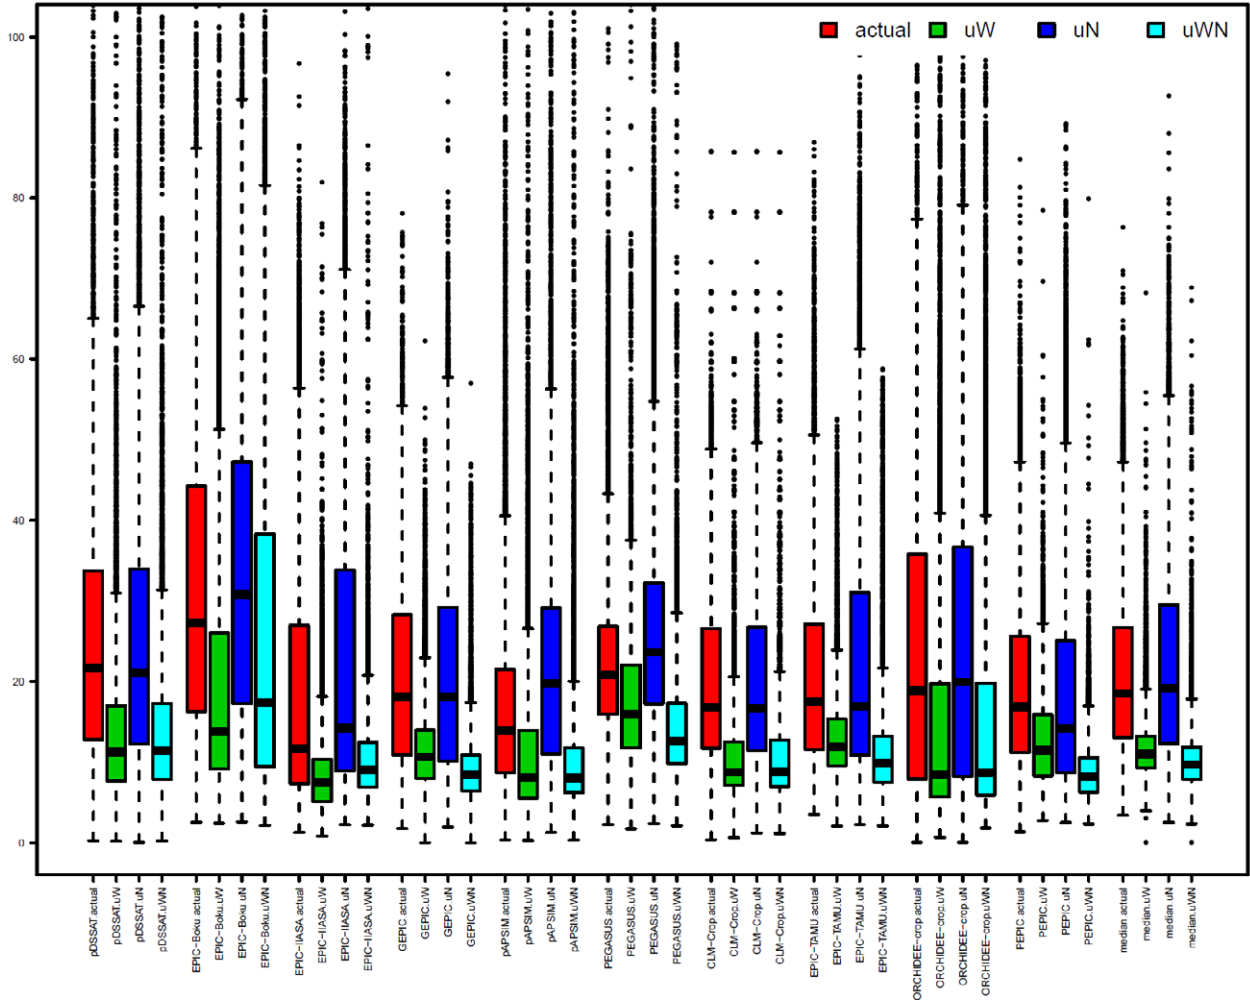

Figure G: Same as Fig 3 of the main text, but for wheat.

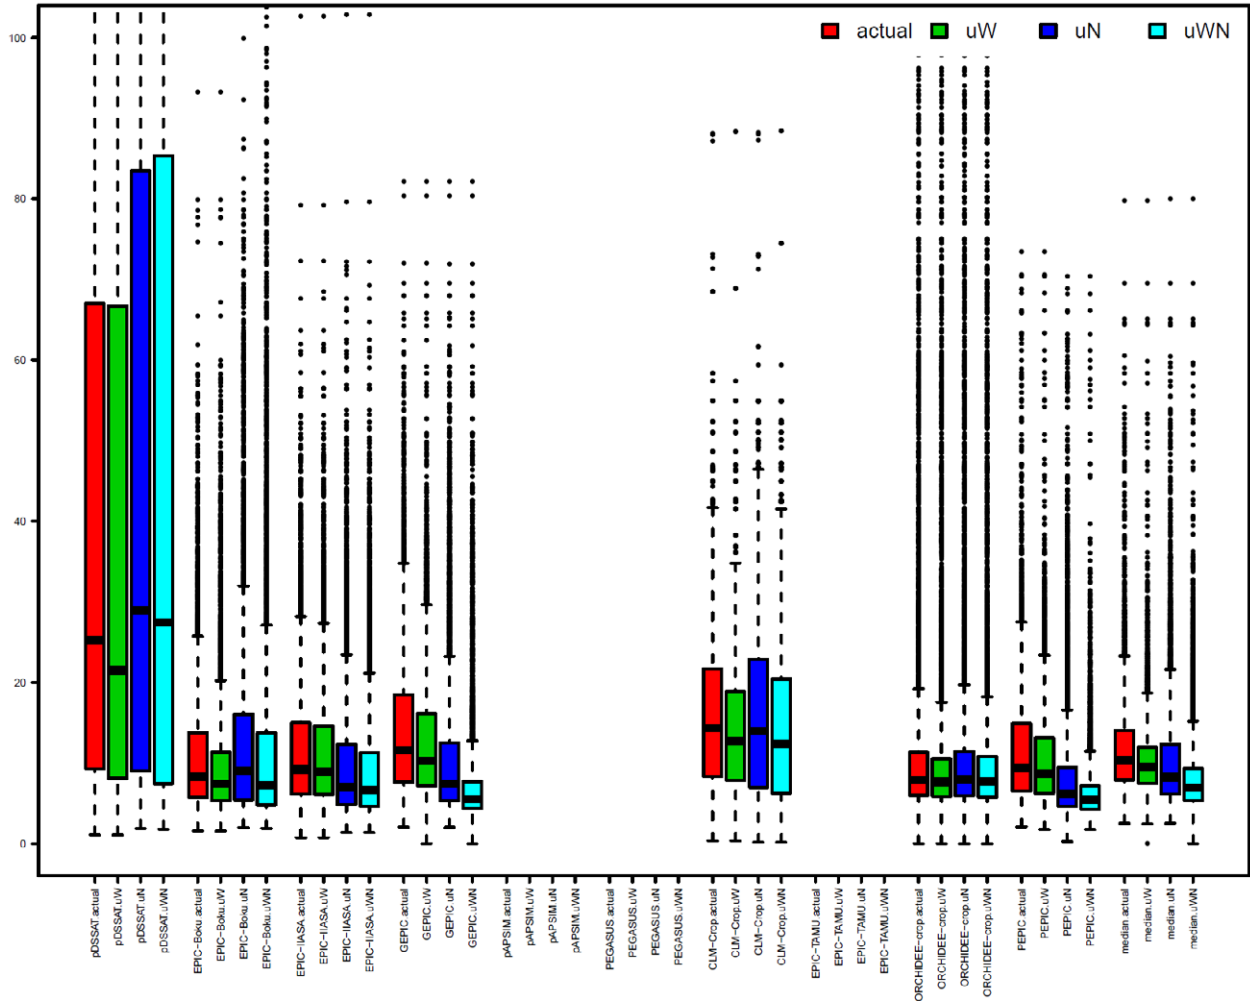

Figure H: same as Fig 3 of the main text, but for rice.

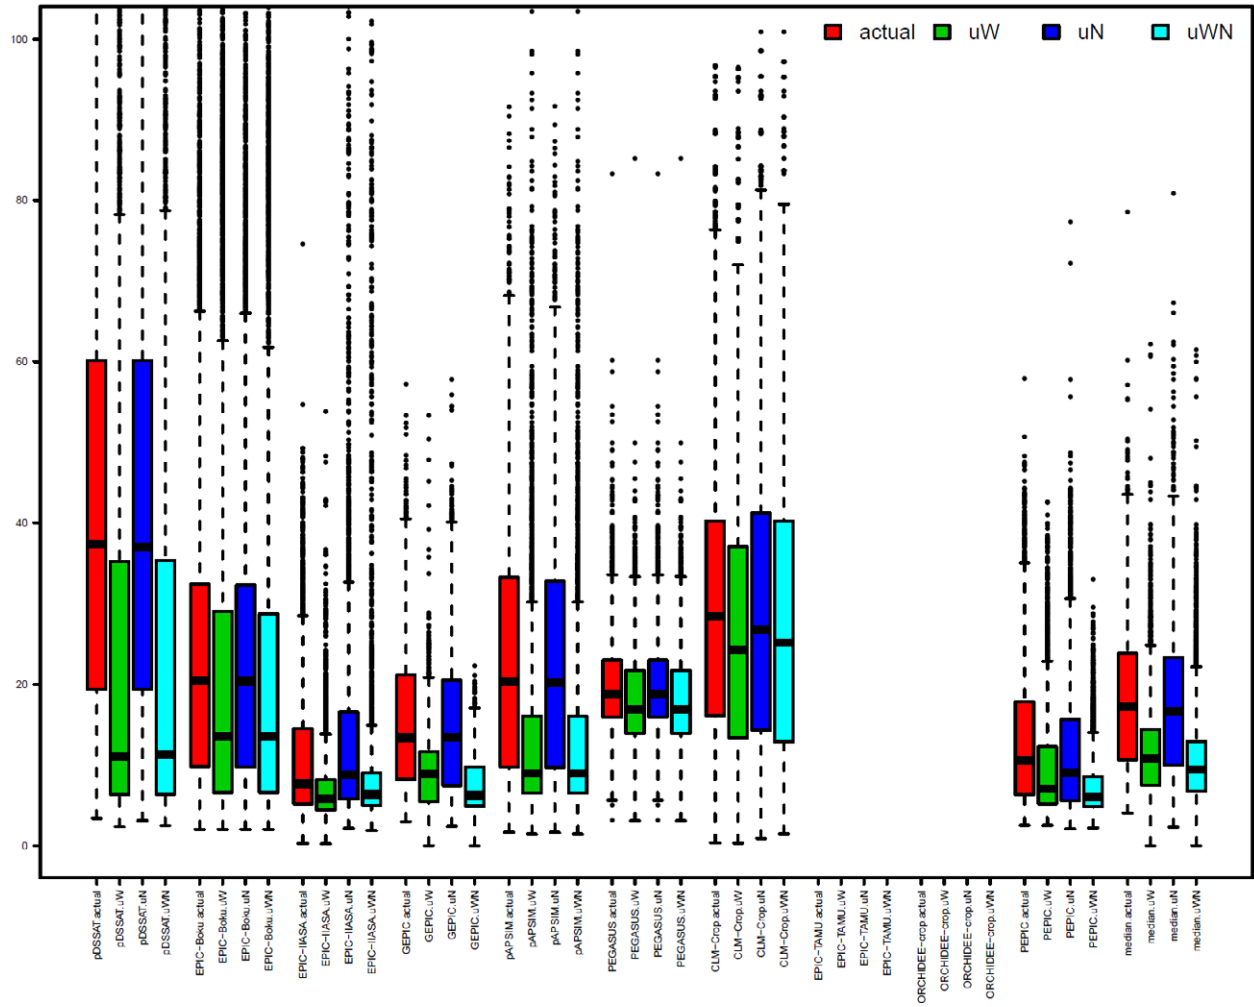

Figure I: Same as Fig 3 of the main text, but for soybean.

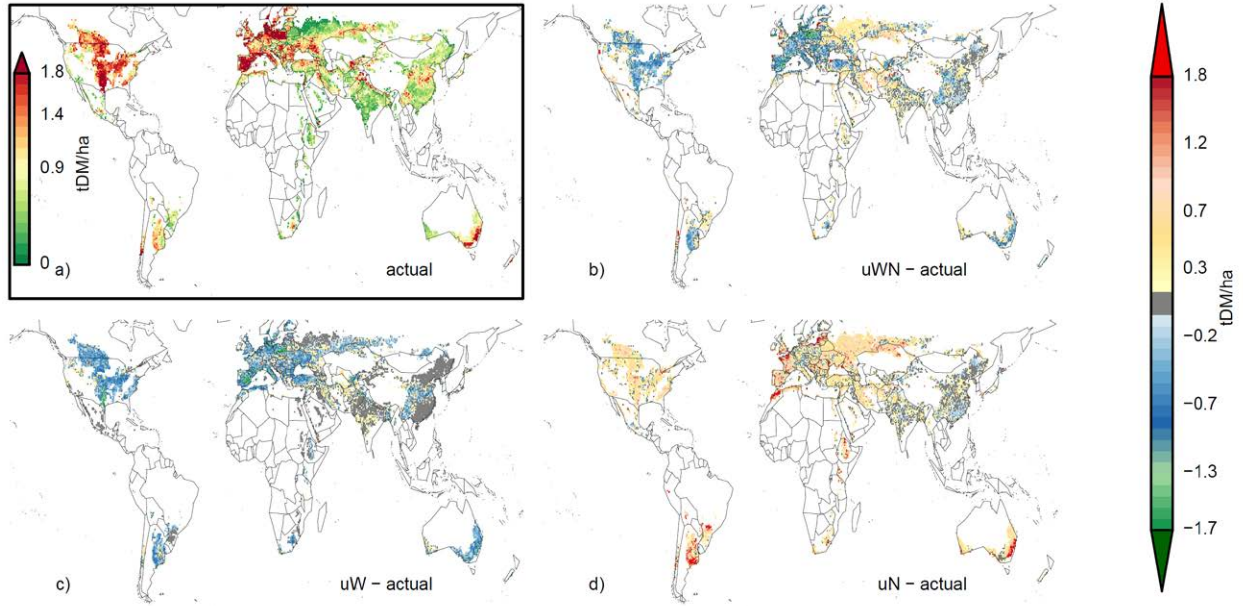

Figure J: Same as Fig 4 of the main text, but for wheat.

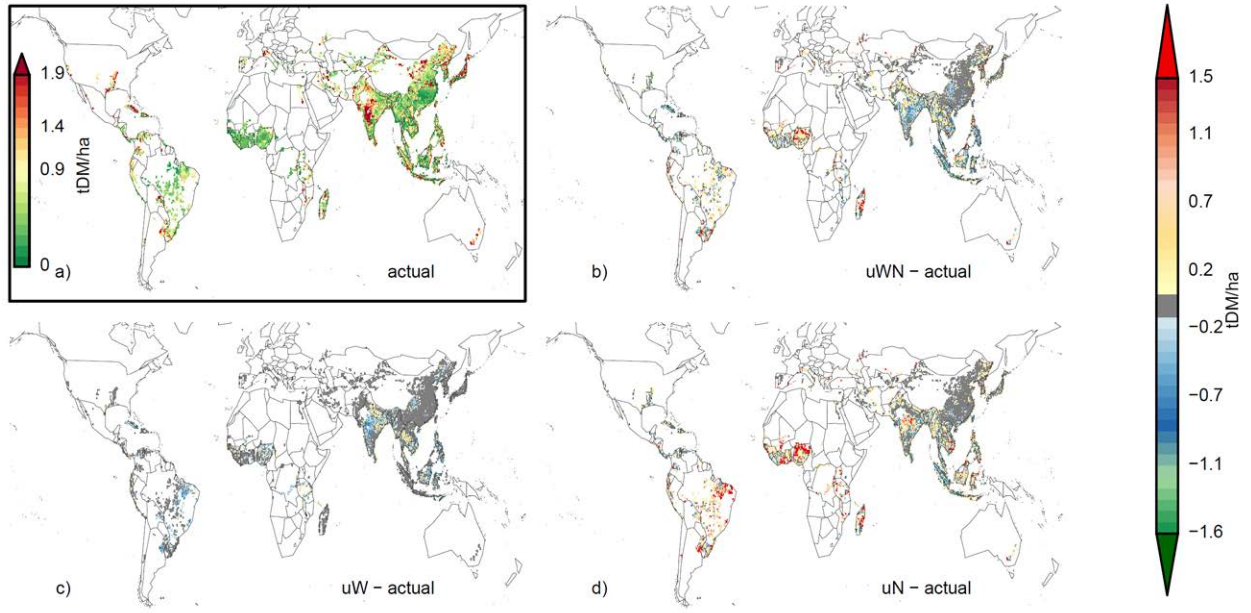

Figure K: Same as Fig 4 of the main text, but for rice

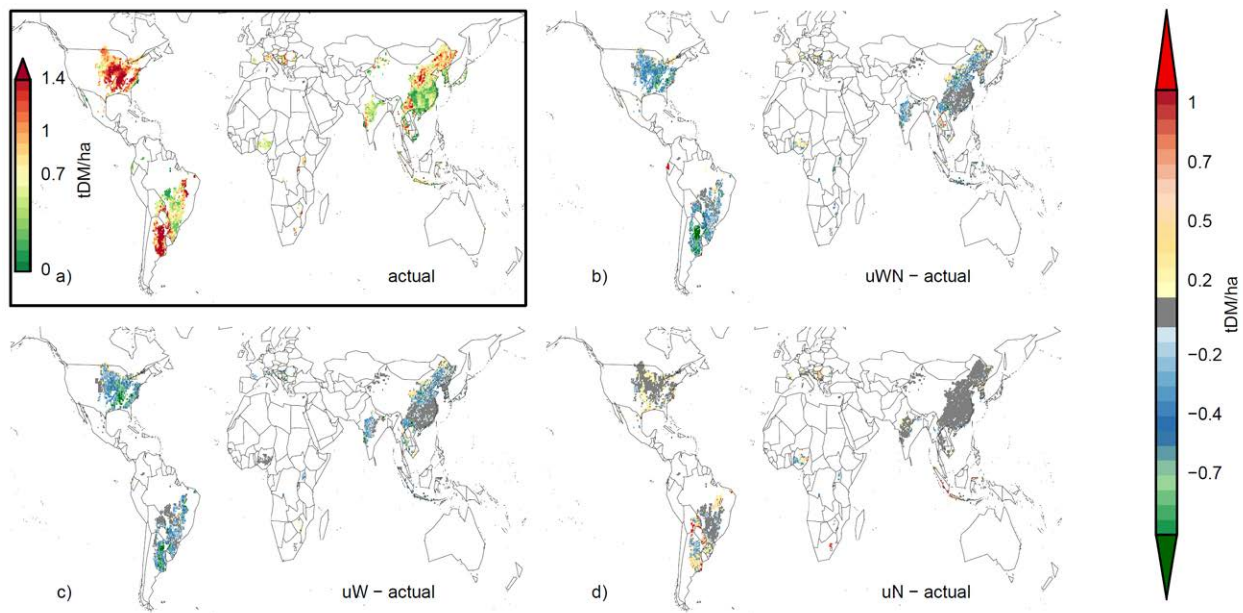

Figure L: Same as Fig 4 of the main text, but for soybean.

## References

1. FAOstat data. <http://faostat3.fao.org/home/E> [accessed: May 2014]. 2014.
2. Müller C, Elliott J, Chrysanthacopoulos J, Arneth A, Balkovic J, Ciais P, et al. Global gridded crop model evaluation: benchmarking, skills, deficiencies and implications. *Geosci Model Dev.* 2017;10(4):1403-22. doi: 10.5194/gmd-10-1403-2017.
3. Portmann FT, Siebert S, Döll P. MIRCA2000-Global monthly irrigated and rainfed crop areas around the year 2000: A new high-resolution data set for agricultural and hydrological modeling. *Global Biogeochemical Cycles.* 2010;24:Gb1011. doi: 10.1029/2008gb003435. PubMed PMID: ISI:000275495000001.
